# Supplementary material for: Grape-Derived Polysaccharide Extracts Rich in Rhamnogalacturonans-II as Potential Modulators of White Wine Flavor Compounds
Source: MDPI journal article supplement (doi:10.3390/molecules28186477), 2023-09-06
Supplement: s1 [file s1]

Table S1. Multivariate analysis of variance (MANOVA) of *Viura* wines compounds (T1 and T12). Percentage of variance attributable (%) of the independent effect of Aging time and PS extract, and the interaction of both (Aging x PS extract).

| Compounds                 | Aging time |                 |         | PS extract |                 |              | Aging x PS extract |                 |               | error (%) |
|---------------------------|------------|-----------------|---------|------------|-----------------|--------------|--------------------|-----------------|---------------|-----------|
|                           | F-ratio    | <i>p</i> -value | % Aging | F-ratio    | <i>p</i> -value | % PS extract | F-ratio            | <i>p</i> -value | % Interaction |           |
| Total Flavonols           | 110.902    | <b>0.000</b>    | 39.42%  | 49.911     | <b>0.000</b>    | 53.23%       | 1.555              | 0.239           | 1.66%         | 5.69%     |
| Total Flavanols           | 0.861      | 0.367           | 1.54%   | 9.631      | <b>0.001</b>    | 51.80%       | 3.341              | <b>0.046</b>    | 17.97%        | 28.69%    |
| Total HBAS                | 3.721      | 0.072           | 6.14%   | 2.465      | 0.100           | 12.20%       | 11.163             | <b>0.000</b>    | 55.26%        | 26.40%    |
| Total HCAS                | 1364.529   | <b>0.000</b>    | 97.36%  | 3.566      | <b>0.038</b>    | 0.76%        | 3.428              | <b>0.043</b>    | 0.73%         | 1.14%     |
| Total Monomeric Phenolics | 278.490    | <b>0.000</b>    | 78.80%  | 17.969     | <b>0.000</b>    | 15.25%       | 1.669              | 0.213           | 1.42%         | 4.53%     |
| Total Polymeric Phenolics | 52.825     | <b>0.000</b>    | 62.99%  | 4.219      | <b>0.022</b>    | 15.09%       | 0.795              | 0.514           | 2.84%         | 19.08%    |
| Total Alcohols            | 1065.930   | <b>0.000</b>    | 88.99%  | 25.397     | <b>0.000</b>    | 6.36%        | 13.219             | <b>0.000</b>    | 3.31%         | 1.34%     |
| Total C6 Alcohols         | 389.607    | <b>0.000</b>    | 40.52%  | 96.848     | <b>0.000</b>    | 30.22%       | 88.442             | <b>0.000</b>    | 27.60%        | 1.66%     |
| Total Esters              | 30,753.957 | <b>0.000</b>    | 98.22%  | 106.242    | <b>0.000</b>    | 1.02%        | 74.036             | <b>0.000</b>    | 0.71%         | 0.05%     |
| Total Acetates            | 1013.624   | <b>0.000</b>    | 62.27%  | 91.874     | <b>0.000</b>    | 16.93%       | 107.493            | <b>0.000</b>    | 19.81%        | 0.98%     |
| Total Acids               | 1308.872   | <b>0.000</b>    | 61.20%  | 126.883    | <b>0.000</b>    | 17.80%       | 144.338            | <b>0.000</b>    | 20.25%        | 0.75%     |
| Total Volatile Phenols    | 10,705.579 | <b>0.000</b>    | 98.89%  | 25.125     | <b>0.000</b>    | 0.70%        | 9.681              | <b>0.001</b>    | 0.27%         | 0.15%     |
| Total Terpenes            | 684.490    | <b>0.000</b>    | 66.93%  | 53.281     | <b>0.000</b>    | 15.63%       | 54.115             | <b>0.000</b>    | 15.87%        | 1.56%     |

Values in bold showed statistically significant differences in each compound and factor considered (*p*-values < 0.05).

Table S2. Spearman correlation data of *Viura* wines oenological, phenolic, and sensory analysis parameters<sup>a</sup>.

|                             |                    |                                     | Phenolic parameters |                 |                  |                  |                 |                 |             |                         |                           |                 |                   |                   |                       |                  |
|-----------------------------|--------------------|-------------------------------------|---------------------|-----------------|------------------|------------------|-----------------|-----------------|-------------|-------------------------|---------------------------|-----------------|-------------------|-------------------|-----------------------|------------------|
|                             |                    | Correlation parameters <sup>b</sup> | Total myricetin     | Total quercetin | Total kaempferol | Total syringetin | Total Flavonols | Total Flavanols | Gallic acid | Total HCAs <sup>c</sup> | Total monomeric phenolics | PA <sup>c</sup> | %Cat <sup>c</sup> | %Epi <sup>c</sup> | %Epi gal <sup>c</sup> | mDP <sup>c</sup> |
| Sensory analysis parameters | Sweetness          | Q Spearman                          | -0.230              | 0.218           | -0.051           | 0.368            | 0.451           | -0.058          | -0.432      | -0.240                  | 0.054                     | 0.214           | -0.677*           | -0.560            | 0.010                 | 0.455            |
|                             |                    | p-value                             | 0.473               | 0.496           | 0.876            | 0.240            | 0.141           | 0.857           | 0.161       | 0.453                   | 0.866                     | 0.504           | 0.016             | 0.058             | 0.976                 | 0.137            |
|                             | Smoothness         | Q Spearman                          | 0.393               | -0.218          | -0.044           | 0.172            | 0.131           | 0.393           | 0.218       | 0.219                   | 0.306                     | 0.480           | 0.044             | 0.218             | -0.306                | 0.393            |
|                             |                    | p-value                             | 0.206               | 0.495           | 0.893            | 0.593            | 0.685           | 0.206           | 0.495       | 0.495                   | 0.334                     | 0.114           | 0.893             | 0.495             | 0.333                 | 0.206            |
|                             | Acidity            | Q Spearman                          | -0.097              | -0.048          | 0.097            | -0.570           | -0.628*         | -0.290          | 0.290       | 0.073                   | -0.338                    | -0.676*         | 0.724**           | 0.435             | 0.266                 | -0.869**         |
|                             |                    | p-value                             | 0.765               | 0.882           | 0.765            | 0.053            | 0.029           | 0.361           | 0.361       | 0.823                   | 0.283                     | 0.016           | 0.008             | 0.158             | 0.403                 | 0.000            |
|                             | Freshness          | Q Spearman                          | -0.361              | 0.206           | 0.513            | -0.199           | 0.034           | -0.176          | 0.441       | -0.021                  | -0.168                    | 0.231           | -0.559            | 0.303             | -0.341                | 0.378            |
|                             |                    | p-value                             | 0.248               | 0.521           | 0.088            | 0.536            | 0.917           | 0.583           | 0.151       | 0.948                   | 0.602                     | 0.470           | 0.059             | 0.339             | 0.278                 | 0.225            |
|                             | Astringency        | Q Spearman                          | -0.821**            | 0.869**         | 0.869**          | -0.570           | 00.000          | -0.579*         | 0.241       | -0.145                  | -0.386                    | -0.531          | -0.338            | 0.193             | 0.435                 | -0.145           |
|                             |                    | p-value                             | 0.001               | 0.000           | 0.000            | 0.053            | 10.000          | 0.048           | 0.450       | 0.653                   | 0.215                     | 0.076           | 0.283             | 0.548             | 0.157                 | 0.653            |
|                             | Bitterness         | Q Spearman                          | -0.065              | 0.583*          | 0.389            | -0.255           | 0.130           | 00.000          | 00.000      | 0.130                   | 0.130                     | -0.389          | 0.389             | 0.130             | 0.649*                | -0.194           |
|                             |                    | p-value                             | 0.841               | 0.047           | 0.212            | 0.424            | 0.688           | 10.000          | 10.000      | 0.688                   | 0.688                     | 0.212           | 0.212             | 0.688             | 0.022                 | 0.545            |
|                             | Body               | Q Spearman                          | -0.641*             | 0.362           | 0.641*           | -0.329           | -0.028          | -0.418          | 0.418       | -0.140                  | -0.362                    | 0.028           | -0.697*           | 0.251             | -0.251                | 0.251            |
|                             |                    | p-value                             | 0.025               | 0.247           | 0.025            | 0.296            | 0.931           | 0.176           | 0.176       | 0.665                   | 0.247                     | 0.931           | 0.012             | 0.432             | 0.431                 | 0.432            |
|                             | Duration           | Q Spearman                          | -0.065              | 0.583*          | 0.389            | -0.255           | 0.130           | 00.000          | 00.000      | 0.130                   | 0.130                     | -0.389          | 0.389             | 0.130             | 0.649*                | -0.194           |
|                             |                    | p-value                             | 0.841               | 0.047           | 0.212            | 0.424            | 0.688           | 10.000          | 10.000      | 0.688                   | 0.688                     | 0.212           | 0.212             | 0.688             | 0.022                 | 0.545            |
|                             | Balance            | Q Spearman                          | 0.149               | -0.596          | -0.373           | 0.284            | -0.075          | 0.075           | 0.075       | -0.075                  | -0.075                    | 0.522           | -0.373            | -0.075            | -0.672*               | 0.298            |
|                             |                    | p-value                             | 0.662               | 0.053           | 0.259            | 0.397            | 0.828           | 0.828           | 0.828       | 0.827                   | 0.828                     | 0.100           | 0.259             | 0.828             | 0.023                 | 0.373            |
| Oenological parameters      | Ethanol degree     | Q Spearman                          | 0.384               | 0.384           | 0.325            | 0.078            | 0.355           | 0.591*          | 0.473       | 0.948**                 | 0.591*                    | 0.473           | 0.562             | 0.532             | 0.578*                | 0.355            |
|                             |                    | p-value                             | 0.217               | 0.217           | 0.302            | 0.811            | 0.258           | 0.043           | 0.120       | 0.000                   | 0.043                     | 0.120           | 0.057             | 0.075             | 0.049                 | 0.258            |
|                             | Titratable acidity | Q Spearman                          | 0.384               | 0.384           | 0.325            | 0.078            | 0.355           | 0.591*          | 0.473       | 0.948**                 | 0.591*                    | 0.473           | 0.562             | 0.532             | 0.578*                | 0.355            |
|                             |                    | p-value                             | 0.217               | 0.217           | 0.302            | 0.811            | 0.258           | 0.043           | 0.120       | 0.000                   | 0.043                     | 0.120           | 0.057             | 0.075             | 0.049                 | 0.258            |
|                             | Volatile acidity   | Q Spearman                          | 0.384               | 0.384           | 0.325            | 0.078            | 0.355           | 0.591*          | 0.473       | 0.948**                 | 0.591*                    | 0.473           | 0.562             | 0.532             | 0.578*                | 0.355            |
|                             |                    | p-value                             | 0.217               | 0.217           | 0.302            | 0.811            | 0.258           | 0.043           | 0.120       | 0.000                   | 0.043                     | 0.120           | 0.057             | 0.075             | 0.049                 | 0.258            |
|                             | Malic acid         | Q Spearman                          | 0.384               | 0.384           | 0.325            | 0.078            | 0.355           | 0.591*          | 0.473       | 0.948**                 | 0.591*                    | 0.473           | 0.562             | 0.532             | 0.578*                | 0.355            |
|                             |                    | p-value                             | 0.217               | 0.217           | 0.302            | 0.811            | 0.258           | 0.043           | 0.120       | 0.000                   | 0.043                     | 0.120           | 0.057             | 0.075             | 0.049                 | 0.258            |
|                             | pH                 | Q Spearman                          | 0.384               | 0.384           | 0.325            | 0.078            | 0.355           | 0.591*          | 0.473       | 0.948**                 | 0.591*                    | 0.473           | 0.562             | 0.532             | 0.578*                | 0.355            |
|                             |                    | p-value                             | 0.217               | 0.217           | 0.302            | 0.811            | 0.258           | 0.043           | 0.120       | 0.000                   | 0.043                     | 0.120           | 0.057             | 0.075             | 0.049                 | 0.258            |
|                             | Free SO2           | Q Spearman                          | 0.384               | 0.384           | 0.325            | 0.078            | 0.355           | 0.591*          | 0.473       | 0.948**                 | 0.591*                    | 0.473           | 0.562             | 0.532             | 0.578*                | 0.355            |
|                             |                    | p-value                             | 0.217               | 0.217           | 0.302            | 0.811            | 0.258           | 0.043           | 0.120       | 0.000                   | 0.043                     | 0.120           | 0.057             | 0.075             | 0.049                 | 0.258            |
|                             | Total SO2          | Q Spearman                          | 0.384               | 0.384           | 0.325            | 0.078            | 0.355           | 0.591*          | 0.473       | 0.948**                 | 0.591*                    | 0.473           | 0.562             | 0.532             | 0.578*                | 0.355            |
|                             |                    | p-value                             | 0.217               | 0.217           | 0.302            | 0.811            | 0.258           | 0.043           | 0.120       | 0.000                   | 0.043                     | 0.120           | 0.057             | 0.075             | 0.049                 | 0.258            |
|                             | Absorbance 420nm   | Q Spearman                          | 0.384               | 0.384           | 0.325            | 0.078            | 0.355           | 0.591*          | 0.473       | 0.948**                 | 0.591*                    | 0.473           | 0.562             | 0.532             | 0.578*                | 0.355            |
|                             |                    | p-value                             | 0.217               | 0.217           | 0.302            | 0.811            | 0.258           | 0.043           | 0.120       | 0.000                   | 0.043                     | 0.120           | 0.057             | 0.075             | 0.049                 | 0.258            |

<sup>a</sup> *Viura* wines oenological, phenolic, and sensory analysis parameters (n = 12).<sup>b</sup> Correlation parameters. Level of significance \* and \*\* indicates significance at  $p < 0.05$  and  $p < 0.01$  respectively.

<sup>c</sup> HCAs: Hydroxycinnamic acids; PA: total proanthocyanidins content (mg L<sup>-1</sup>); Cat: % catechin terminal subunits; Epi: % epicatechin terminal subunits; Epi gal: % epicatechin-gallate terminal subunits; mDP: Mean Degree of Polymerization expressed as the summatory of total subunits divided by the summatory of monomeric Flavan-3-ols.
